# Supplementary material for: An aberrant prostate antigen–specific immune response causes prostatitis in mice and is associated with chronic prostatitis in humans
Source: JCI journal article supplement (doi:10.1172/jci38332), 2009-06-01
Supplement: sd1 [file 1]

## Supplemental Table 1. Histologic score of inflammatory infiltrates

| Pathology Score                    | 0 | 1 | 2   | 3   | 4   |
|------------------------------------|---|---|-----|-----|-----|
| Mononuclear Infiltration in Glands | - | - | +   | ++  | +++ |
| Mononuclear Infiltration in Stroma | - | + | any | any | +++ |

“-”, no infiltration; “+”, rare scattered inflammatory cells; “++”, obvious scattered cells without confluence; “+++”, confluent sheets of cells and / or epithelial injury by inflammatory cells (replacing or destroying mucosal cells).

## Supplemental Figure 1. Aire-deficient male mice possess prostate-specific autoantibodies. (A)

Immunoblotting of prostate, eye, lacrimal, and salivary gland extracts were performed with the sera from male Aire-KO and WT mice on the B6/NOD F2 background (individual mice listed by number). Each lane of the multi-screen immunoblot represents the reactivity of sera from individual mice. (B) Immunoprecipitation of autoantigens was performed using protein G agarose coupled to Aire-sufficient or Aire-KO sera to pull-down proteins contained with prostate extracts. Proteins eluted off the agarose beads were then separated by gel electrophoresis. Unique bands immunoprecipitated (bands A, B, C, C2, D, E, F) by Aire-KO sera were excised and submitted for PMF. Bands C2 and D identified SVS2. Band C identified human keratin 9. Band E identified gamma-actin. The other bands returned “no significant hits.”

**Prostate**

2011 WT  
2251 WT  
540  
541  
560  
583  
619  
654  
663  
664  
665  
704  
705  
755  
787  
791  
820  
870  
1013  
secondary

Marker  
kDa  
83  
39  
31

**Lacrimal Gland**

WT  
WT  
540  
560  
583  
619  
633  
654  
661  
663  
664  
665.1  
665.2  
685  
688  
691  
704  
705  
secondary

Marker  
kDa  
83  
39  
31

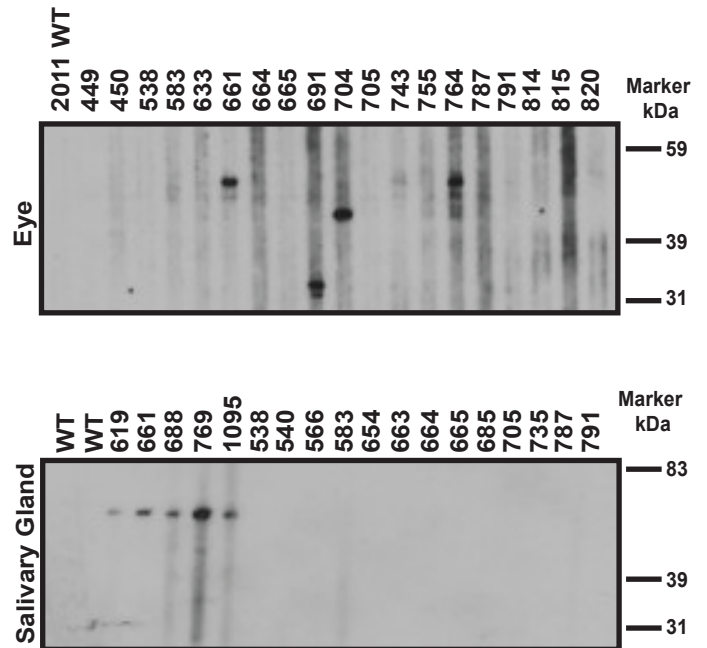

**Ladder 1**

**Ladder 2**

**Aire-KO**

**WT**

100  
75  
50  
37  
25  
20  
15

I  
H  
G  
F  
E  
D  
C  
C2  
B  
A
